# Supplementary material for: Tetraalkyl Hydroxymethylene-bisphosphonate and Dialkyl 1-Diphenylphosphinoyl-1-hydroxy-ethylphosphonate Derivatives by the Pudovik Reaction and Their Rearranged Products
Source: MDPI journal article supplement (doi:10.3390/molecules26247575), 2021-12-14

# Supplementary Materials

## **Tetraalkyl Hydroxymethylene-bisphosphonate and Dialkyl 1-Diphenylphosphinoyl-1-hydroxy-ethylphosphonate Derivatives by the Pudovik Reaction and Their Rearranged Products**

**Zsuzsanna Szalai and György Keglevich \***

Department of Organic Chemistry and Technology, Budapest University of  
Technology and Economics, 1521 Budapest, Hungary

$^{31}\text{P}$ ,  $^{13}\text{C}$  and  $^1\text{H}$  NMR spectra of products

**2, 3, 4, 5-1 + 5-2, 8, 10-1 + 10-2, 11 and 13-1 + 13-2**

Tetraethyl a-hydroxy-ethylidenebisphosphonate SzZs18+21/8.fr. 31P 300MHz

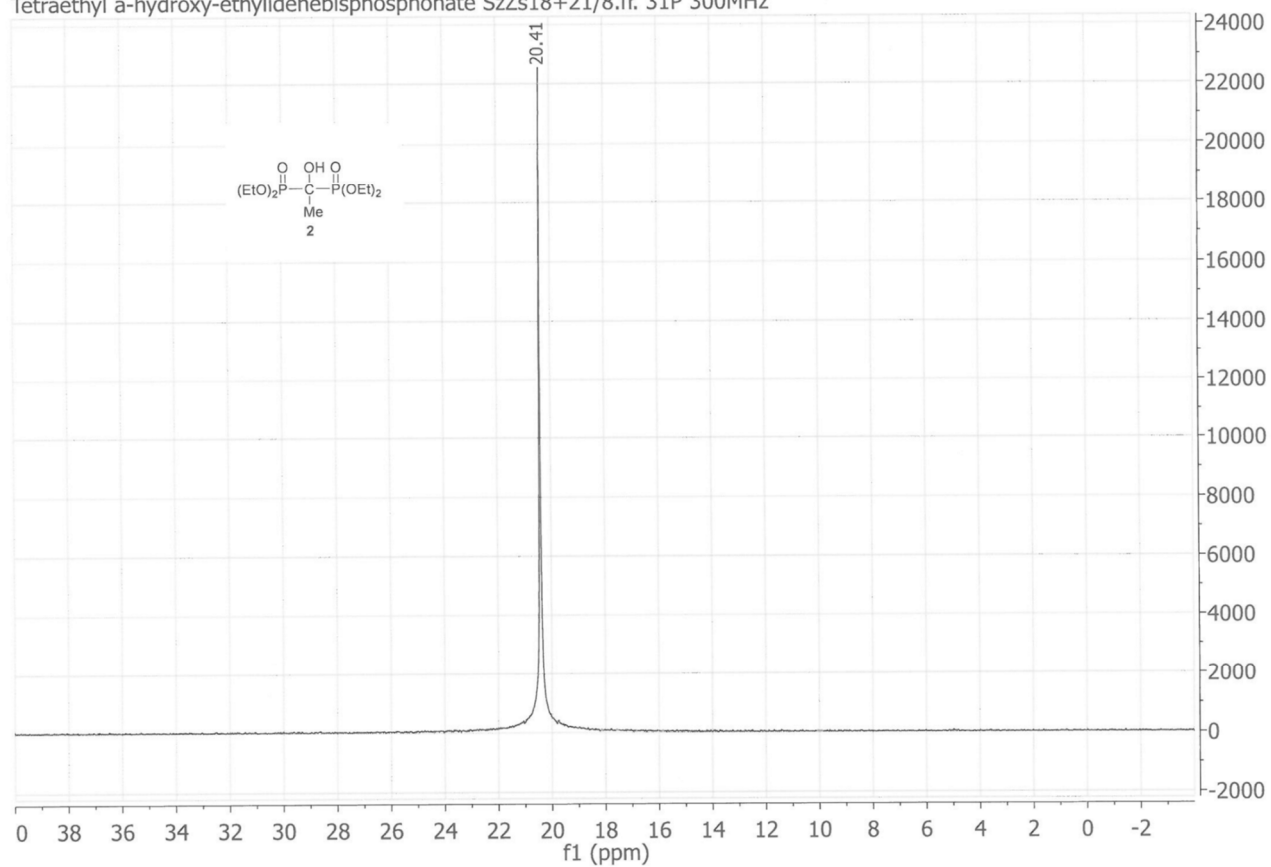

Tetraethyl a-hydroxy-ethylidenebisphosphonate 18+21/8.fr. 13C 300MHz

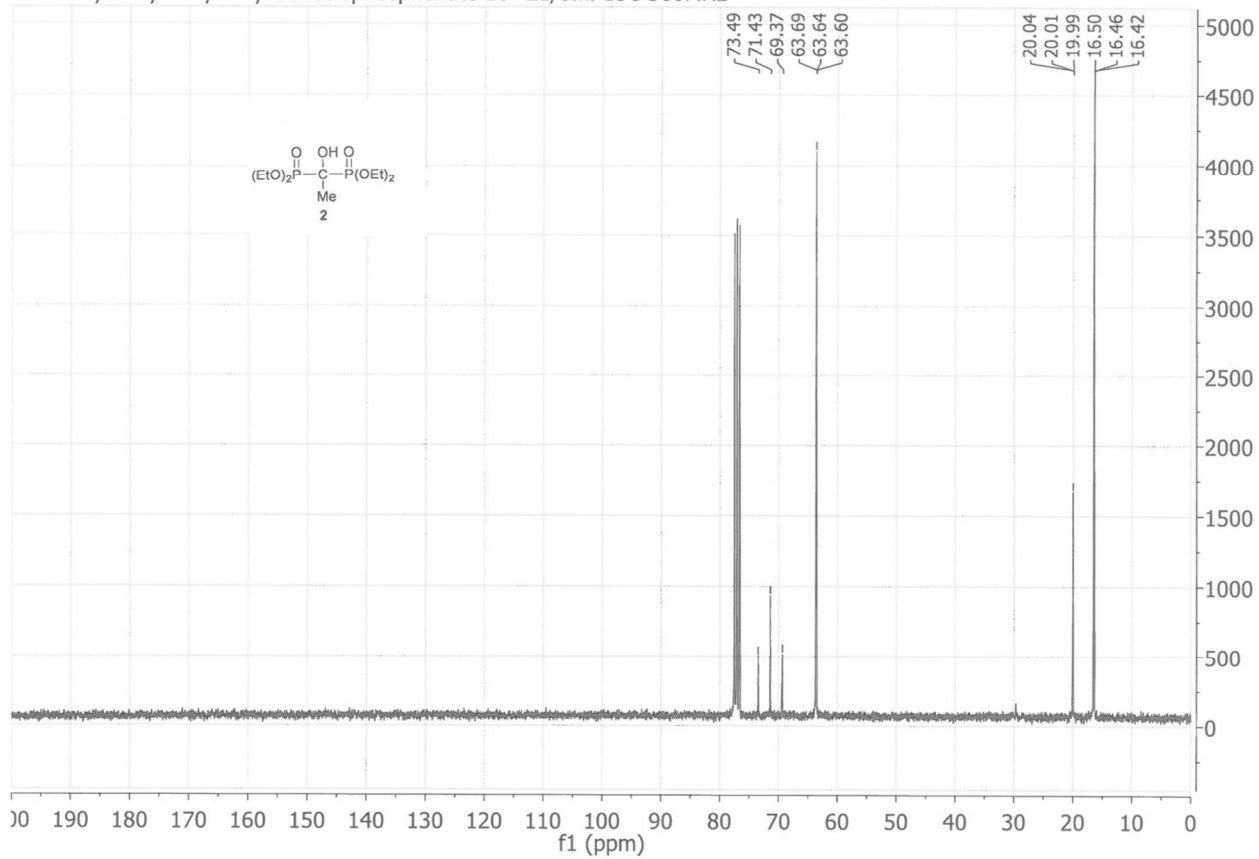

Tetraethyl a-hydroxy-ethylidenebisphosphonate 18+21/8.fr.  $^1\text{H}$  500MHz

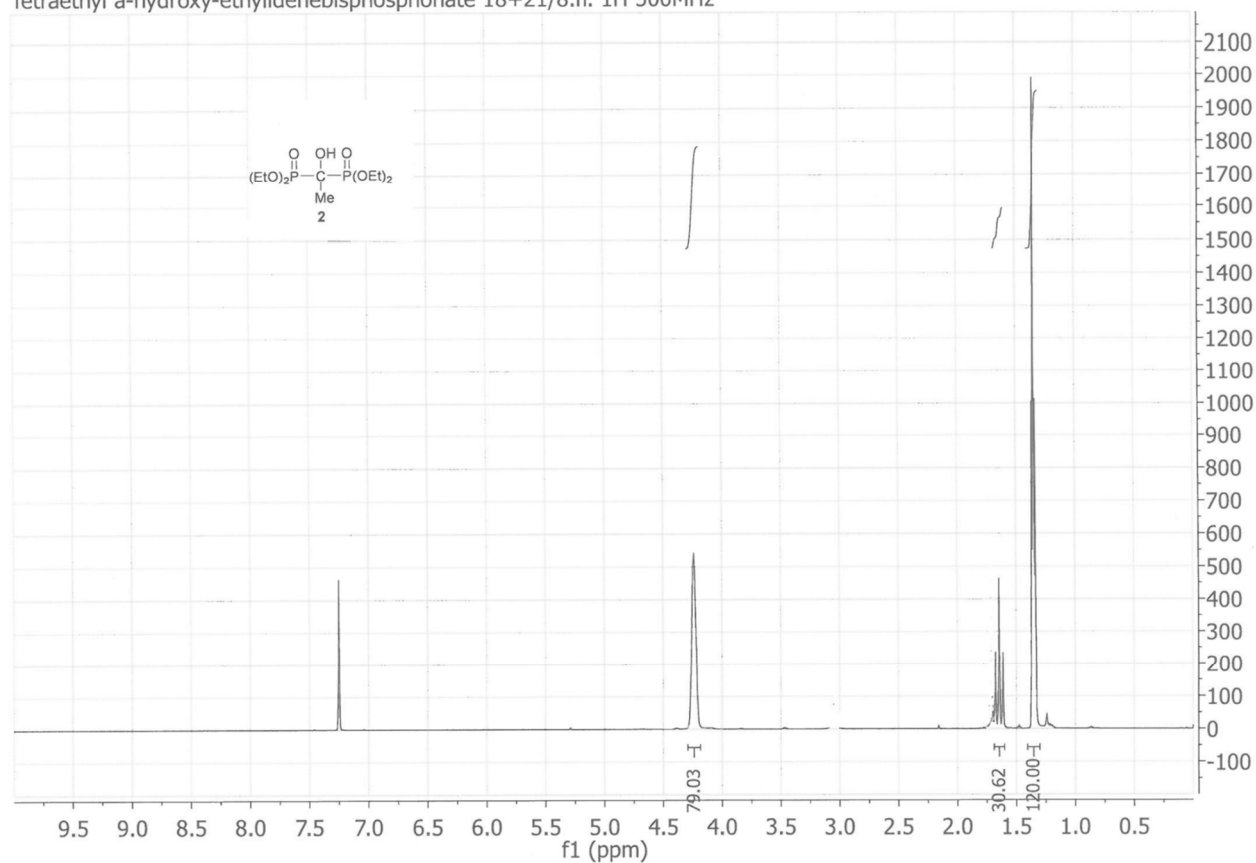

Diethyl 1-(diethylphosphonoylethyl)phosphate SzZs42/2.fr.  $^{31}\text{P}$  500MHz

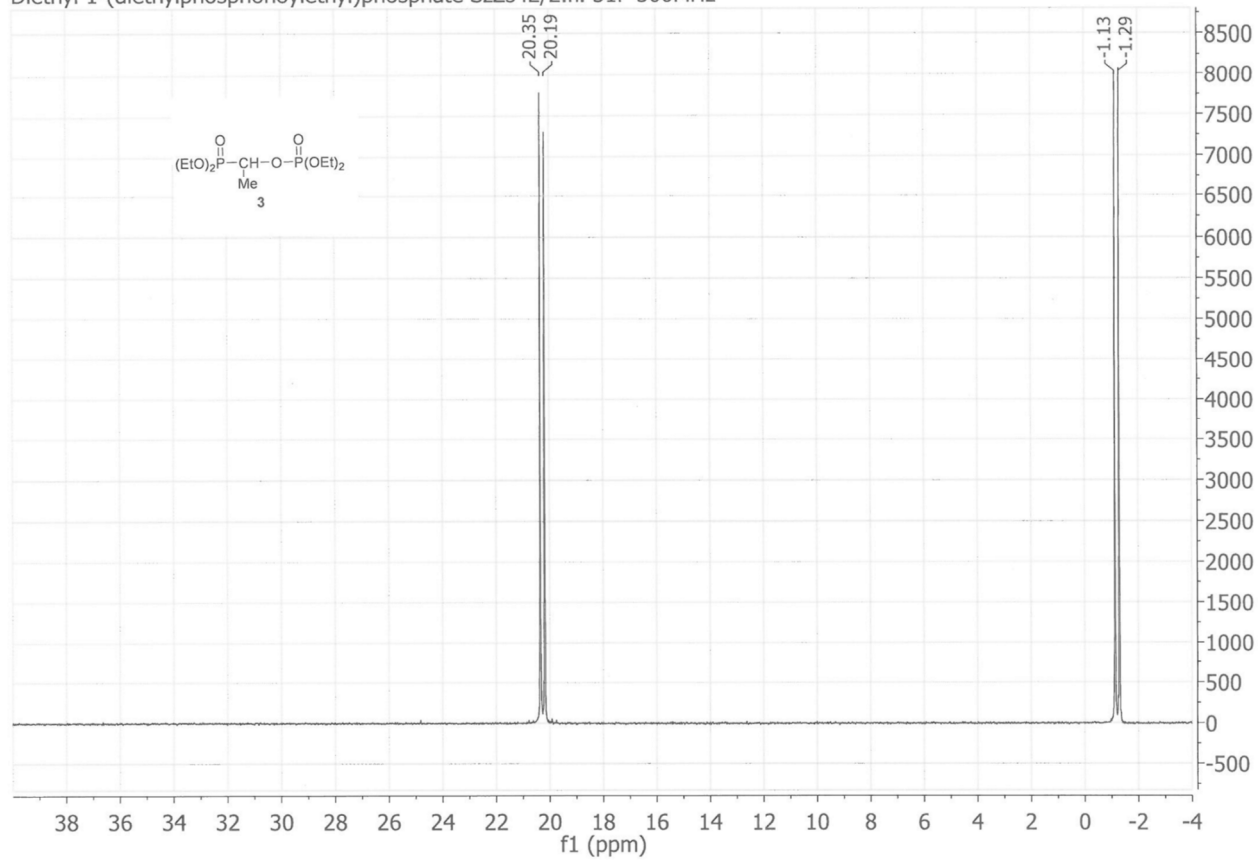

Diethyl 1-(diethylphosphonoylethyl)phosphate SzZs42/2.fr. 13C 300MHz

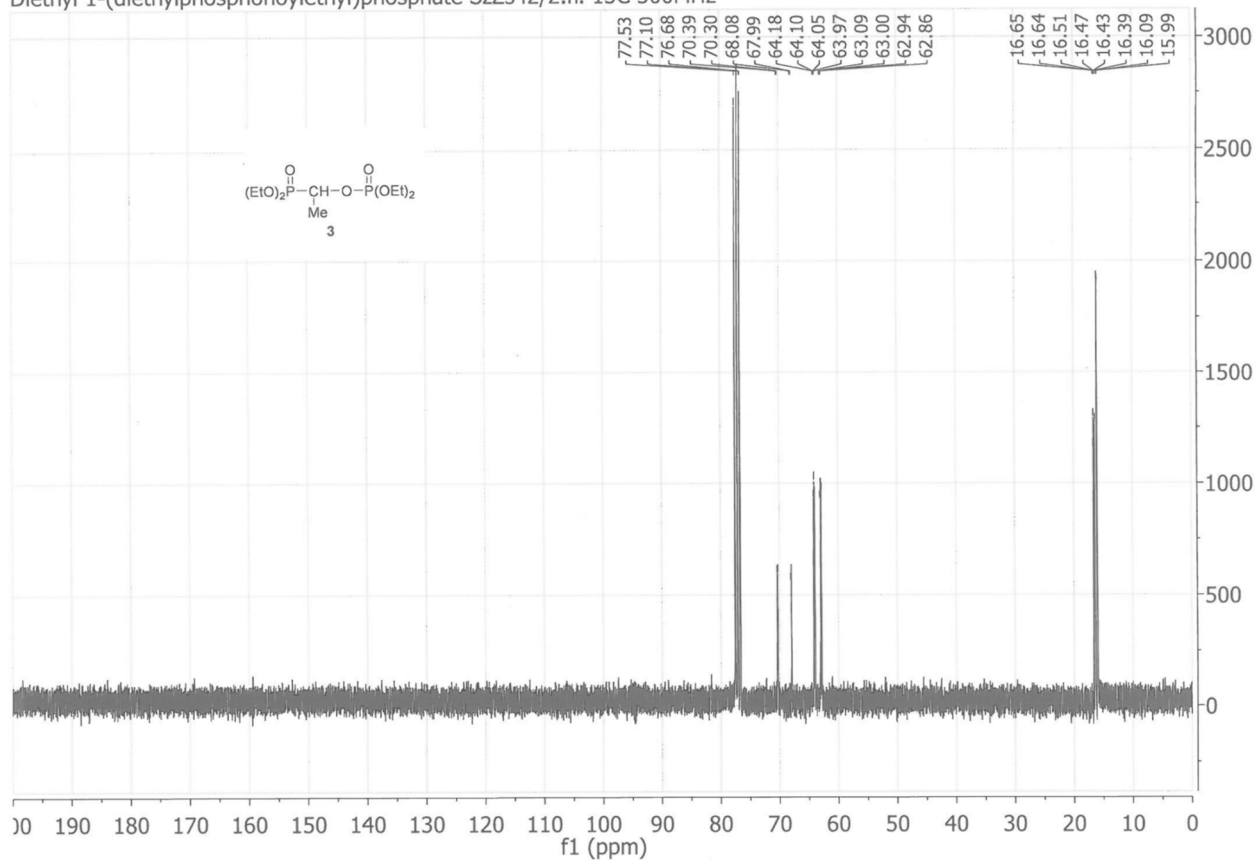

Diethyl 1-(diethylphosphonoylethyl)phosphate SzZs42/2.fr. 1H 500MHz

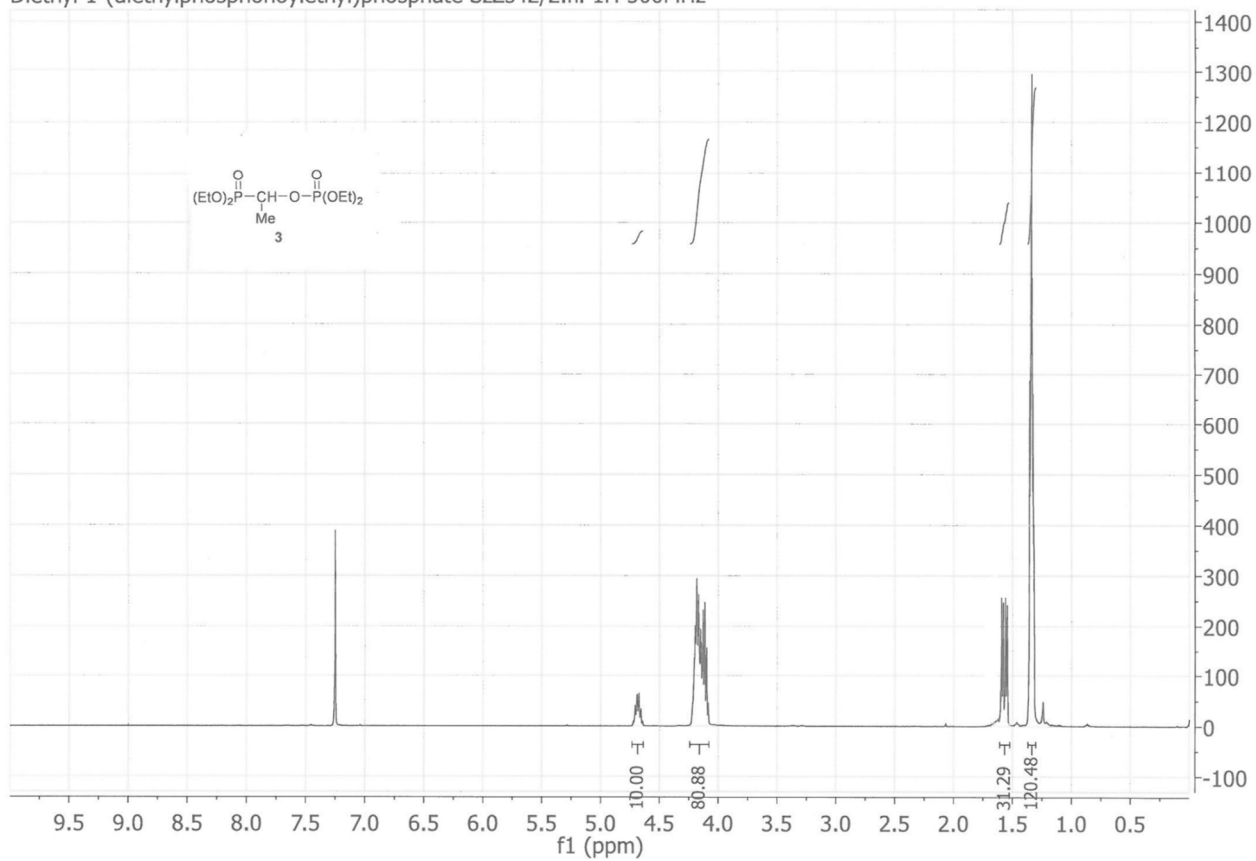



Diethyl dimethyl a-hydroxy-ethylidenebisphosphonate SzZs44ism/6.fr. 31P 500MHz

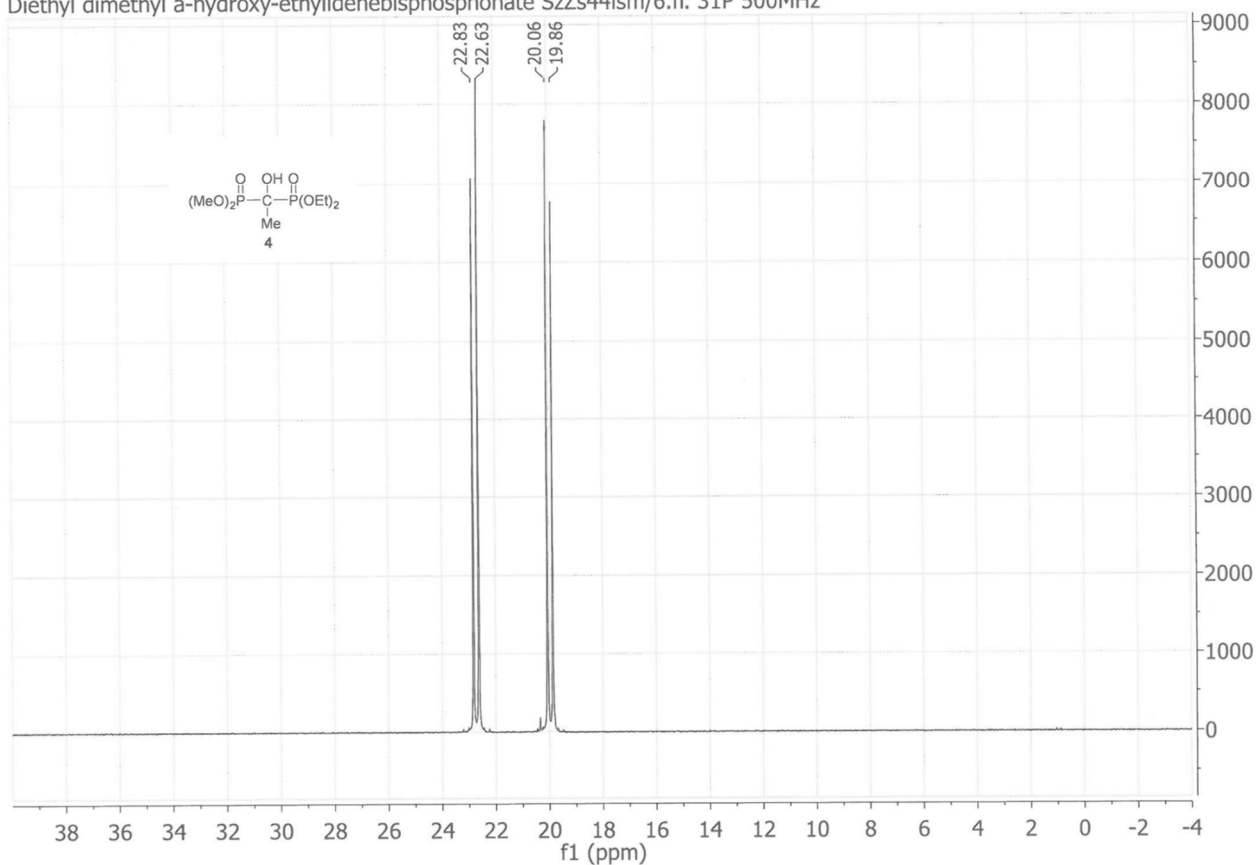

Diethyl dimethyl a-hydroxy-ethylidenebisphosphonate SzZs44ism/6.fr. 13C 300MHz

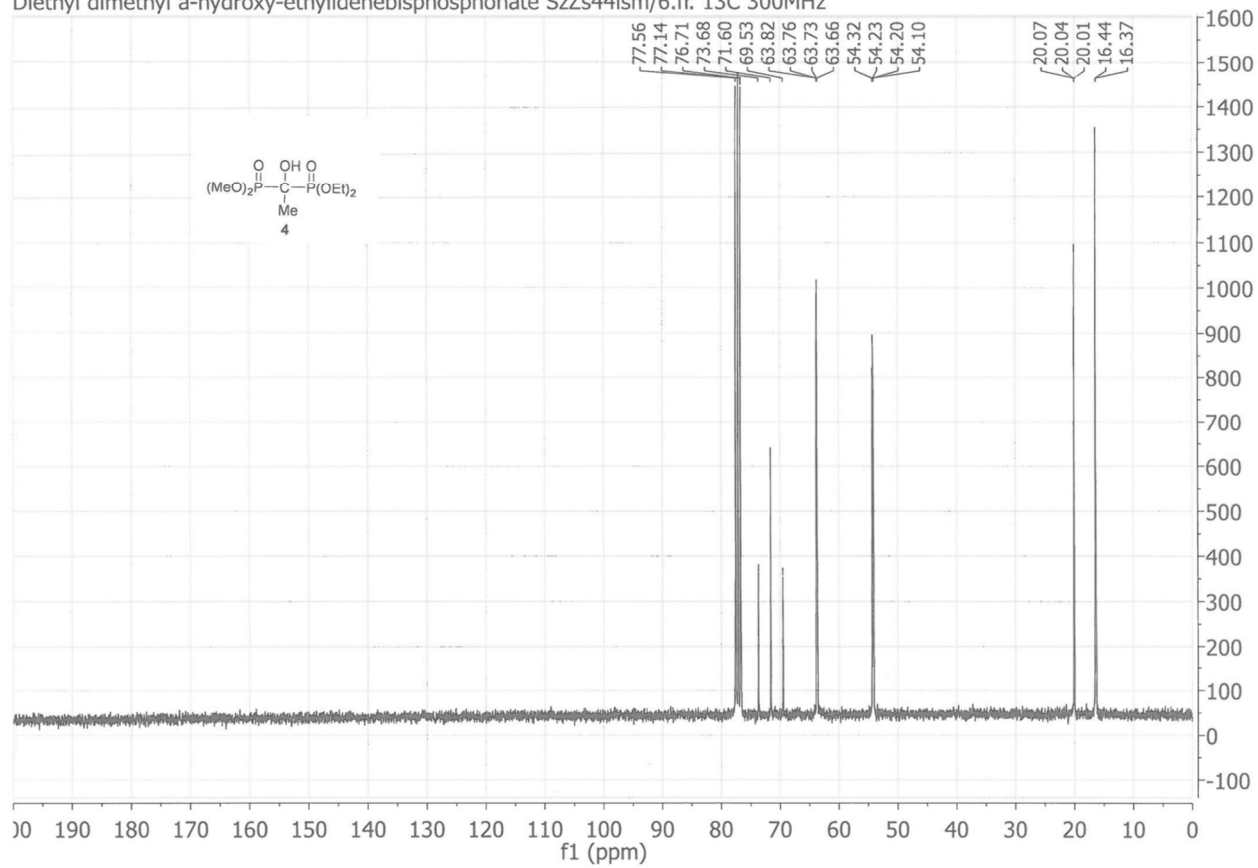

Diethyl dimethyl a-hydroxy-ethylidenebisphosphonate SzZs44ism/6.fr. 1H 300MHz

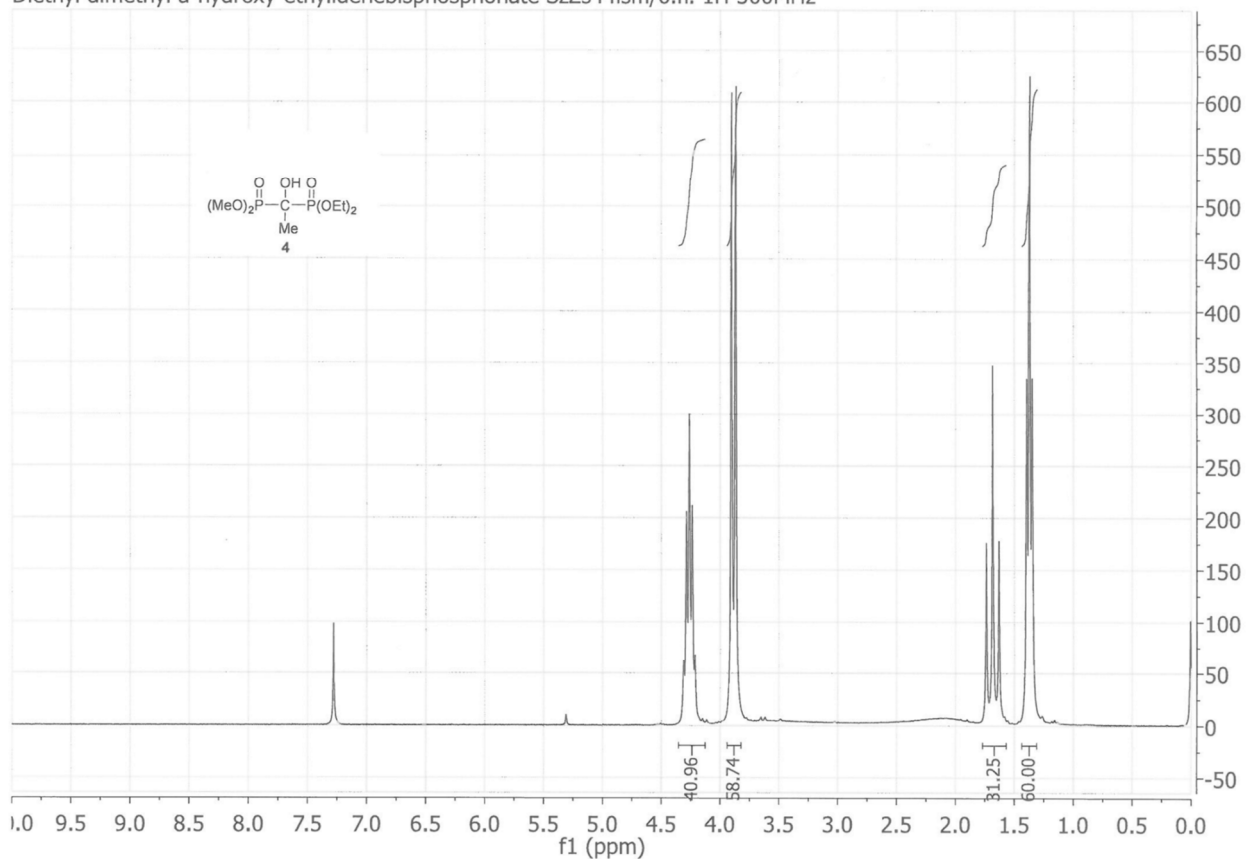

Diethyl 1-(dimethylphosphonoylethyl)phosphate and Dimethyl 1-(diethylphosphonoylethyl)phosphate SzZs43ism/2/3.fr. 31P 500V

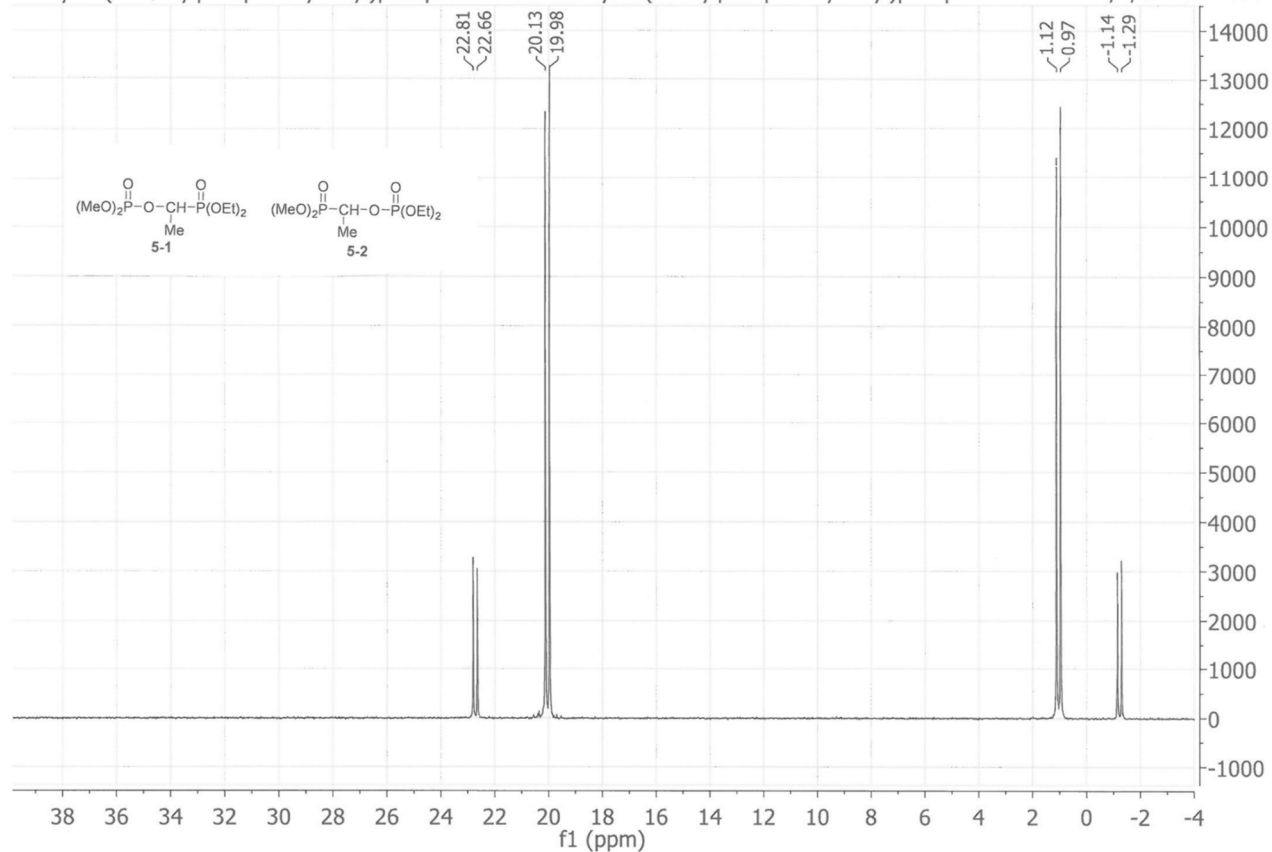

Diethyl 1-(dimethylphosphonoylethyl)phosphate and Dimethyl 1-(diethylphosphonoylethyl)phosphate SzZs43ism/2/3.fr. 13C 300M

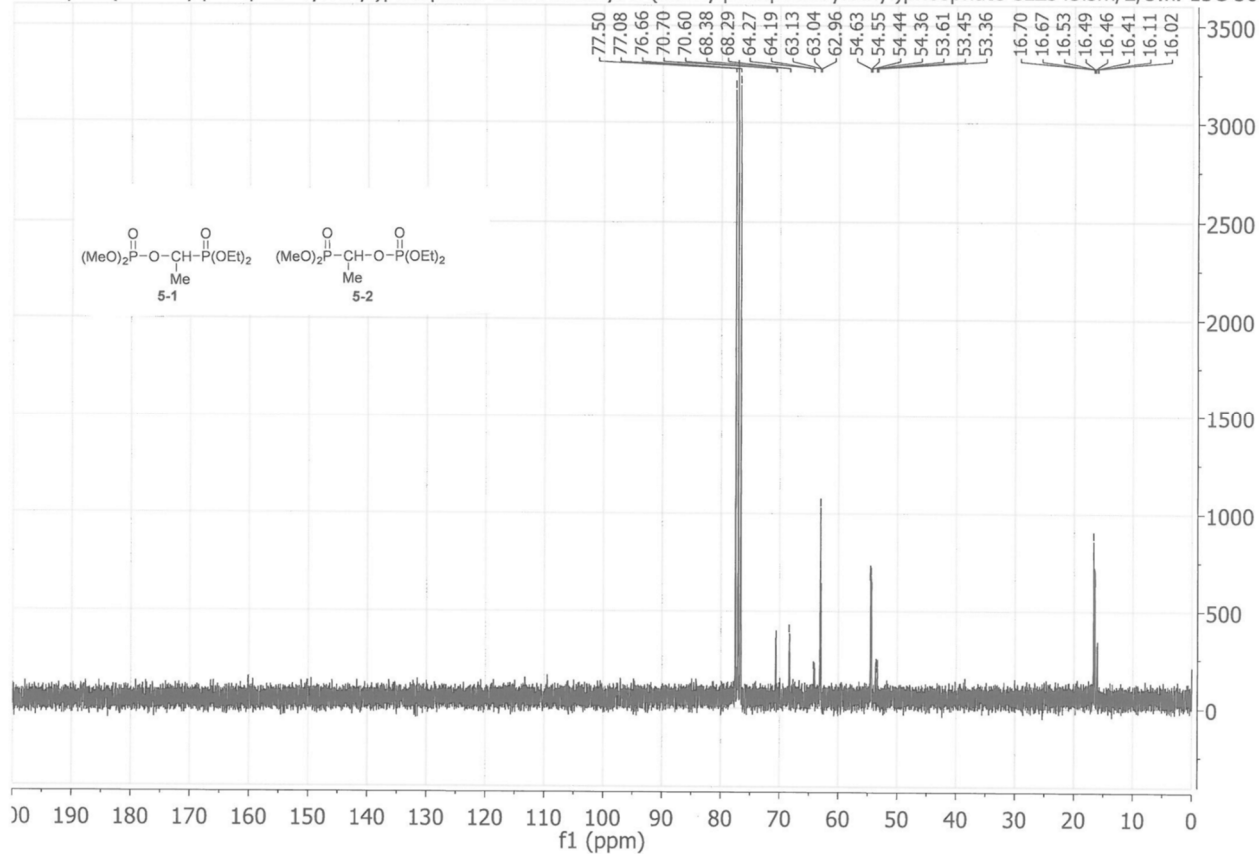

Diethyl 1-(dimethylphosphonoylethyl)phosphate and Dimethyl 1-(diethylphosphonoylethyl)phosphate SzZs43ism/2/3.fr. 1H 500M

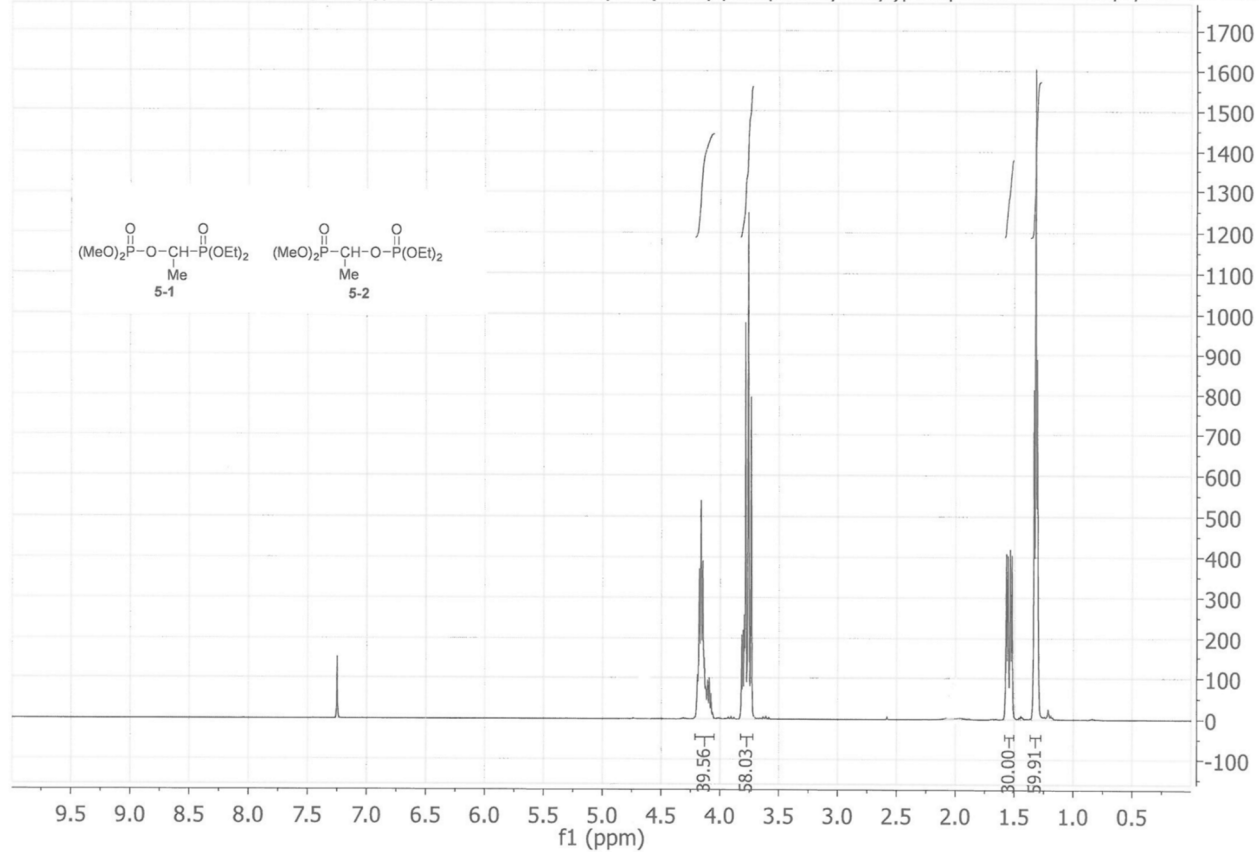

Diethyl (diethylphosphonoylbenzyl)phosphate SzZs70+72/3.fr. 31P 500MHz

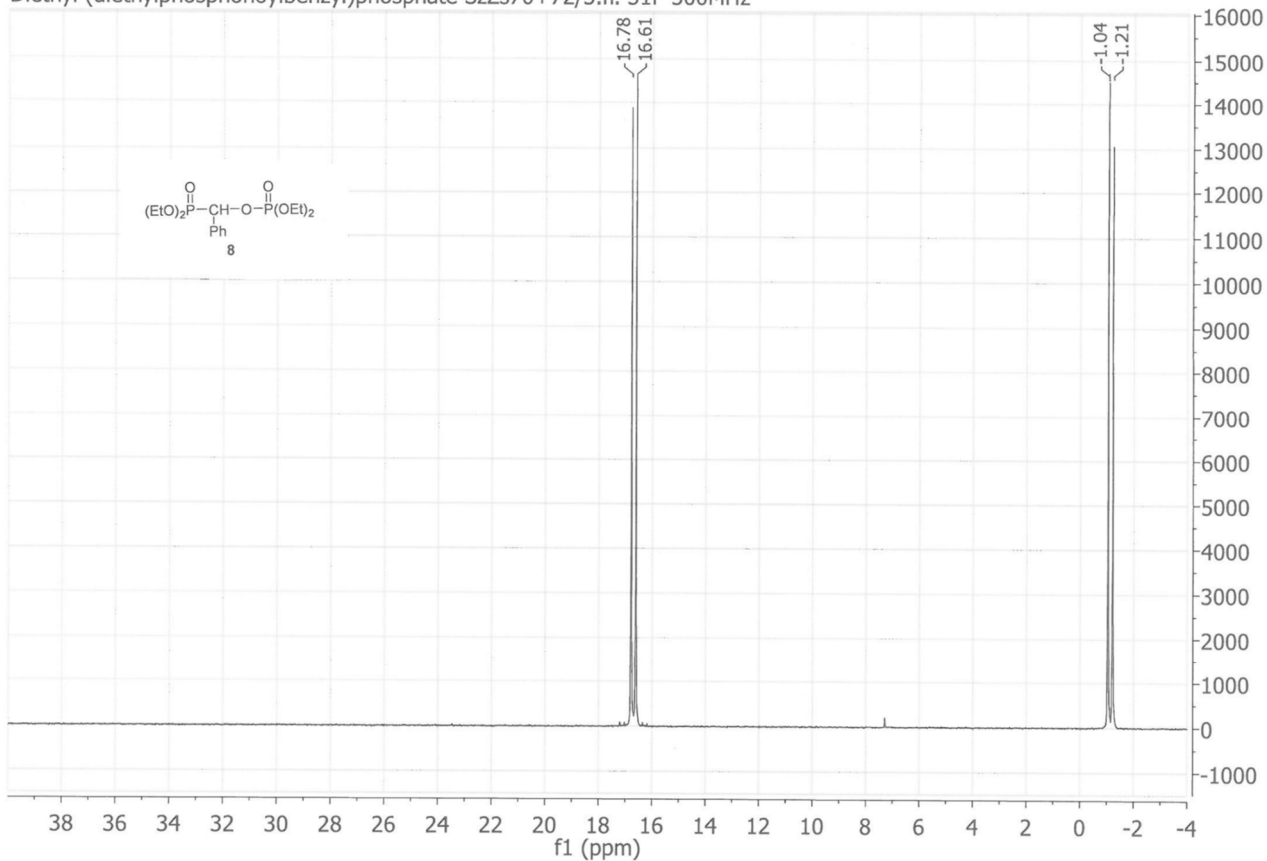

Diethyl (diethylphosphonoylbenzyl)phosphate SzZs70+72/2.fr. 13C 500MHz

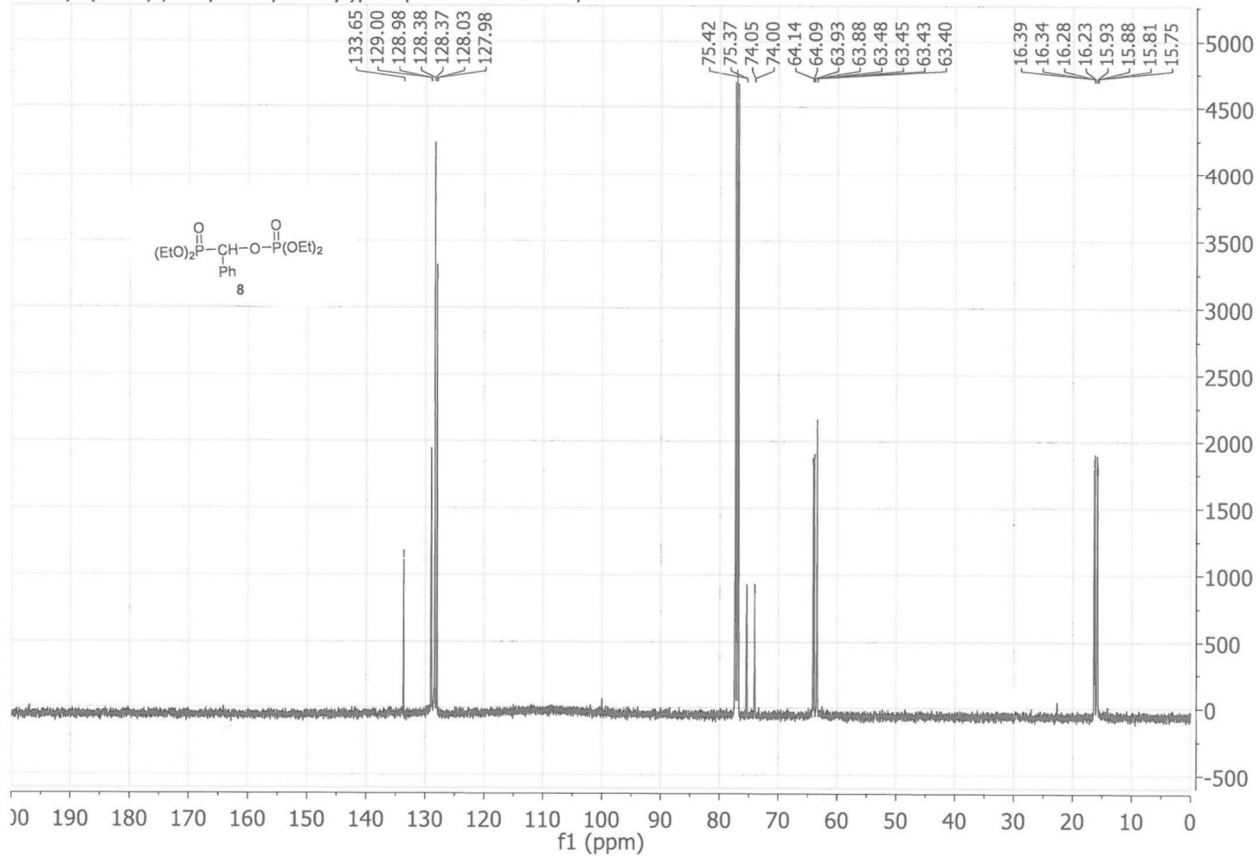

Diethyl (diethylphosphonoylbenzyl)phosphate SzZs70+72/3.fr. 1H 500MHz

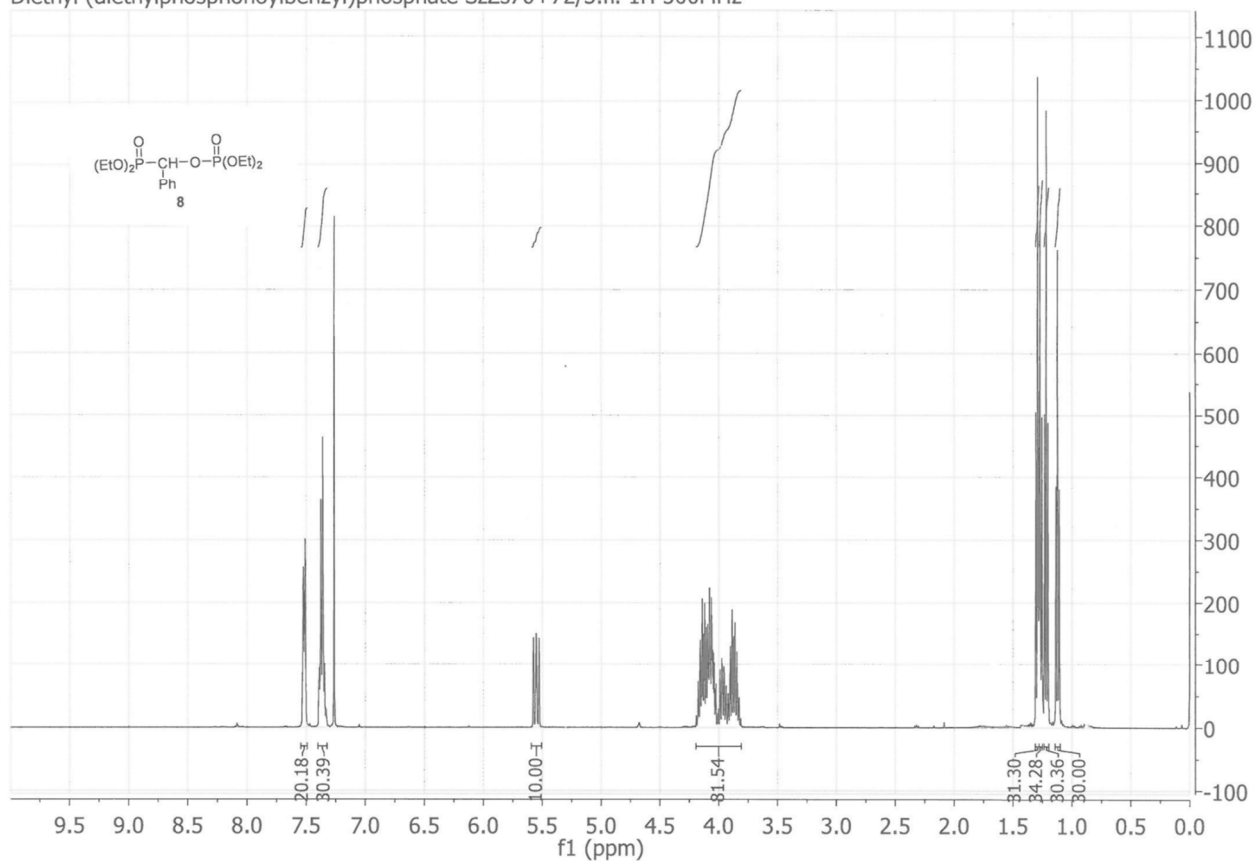

Diethyl (dimethylphosphonoylbenzyl)phosphate and Dimethyl (diethylphosphonoylbenzyl)phosphate SzZs74+75/II.o./2.fr. 31P 500MHz

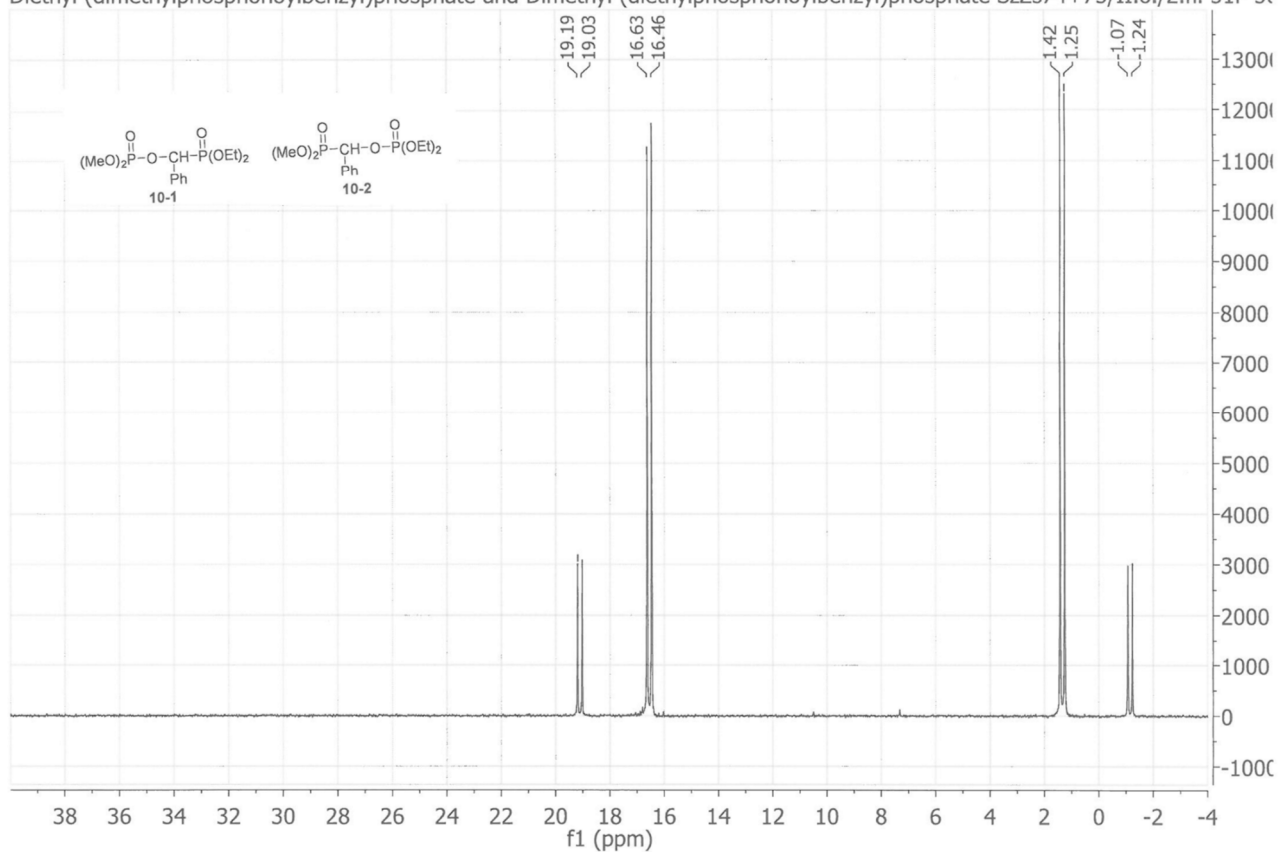

Diethyl (dimethylphosphonoylbenzyl)phosphate and Dimethyl (diethylphosphonoylbenzyl)phosphate SzZs74+75/II.o./2.fr. 13C 50

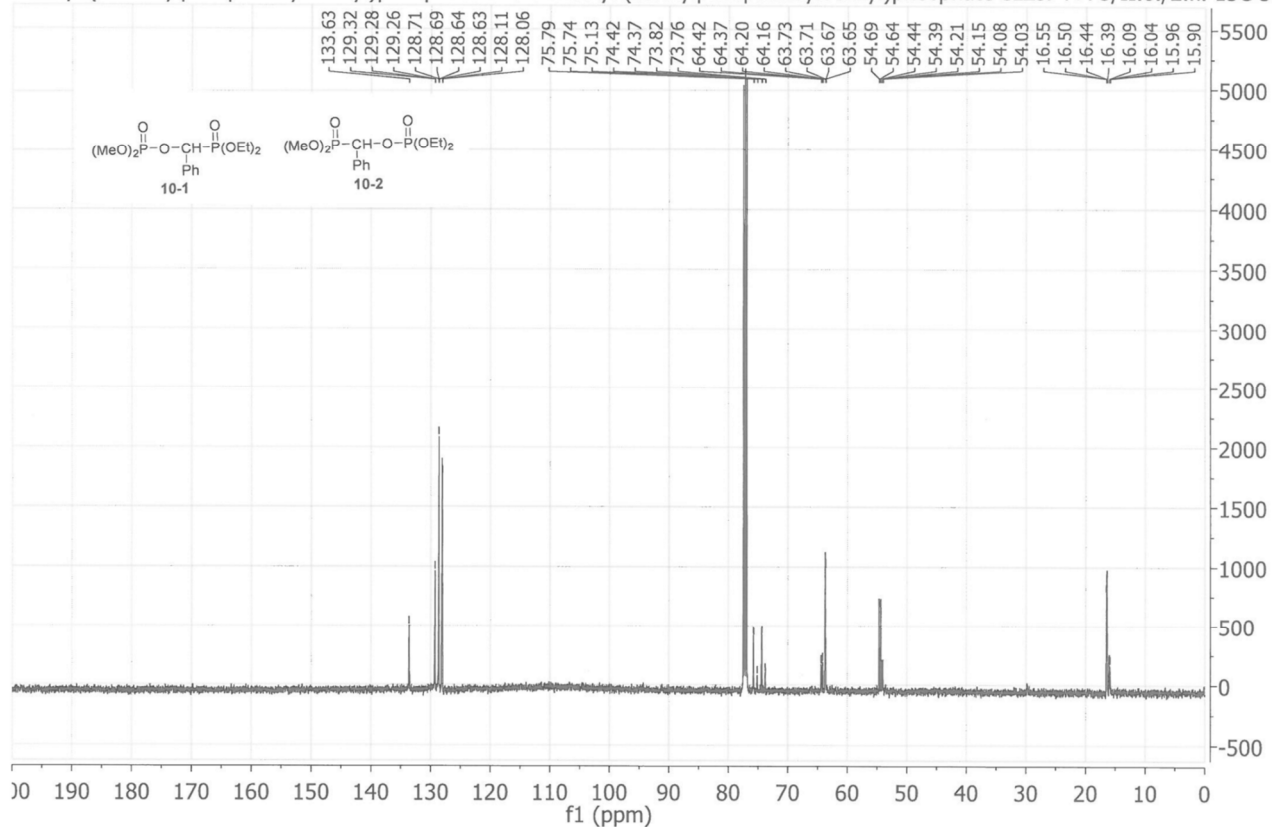

Diethyl (dimethylphosphonoylbenzyl)phosphate and Dimethyl (diethylphosphonoylbenzyl)phosphate SzZs74+75/II.o./2.fr. 1H 50

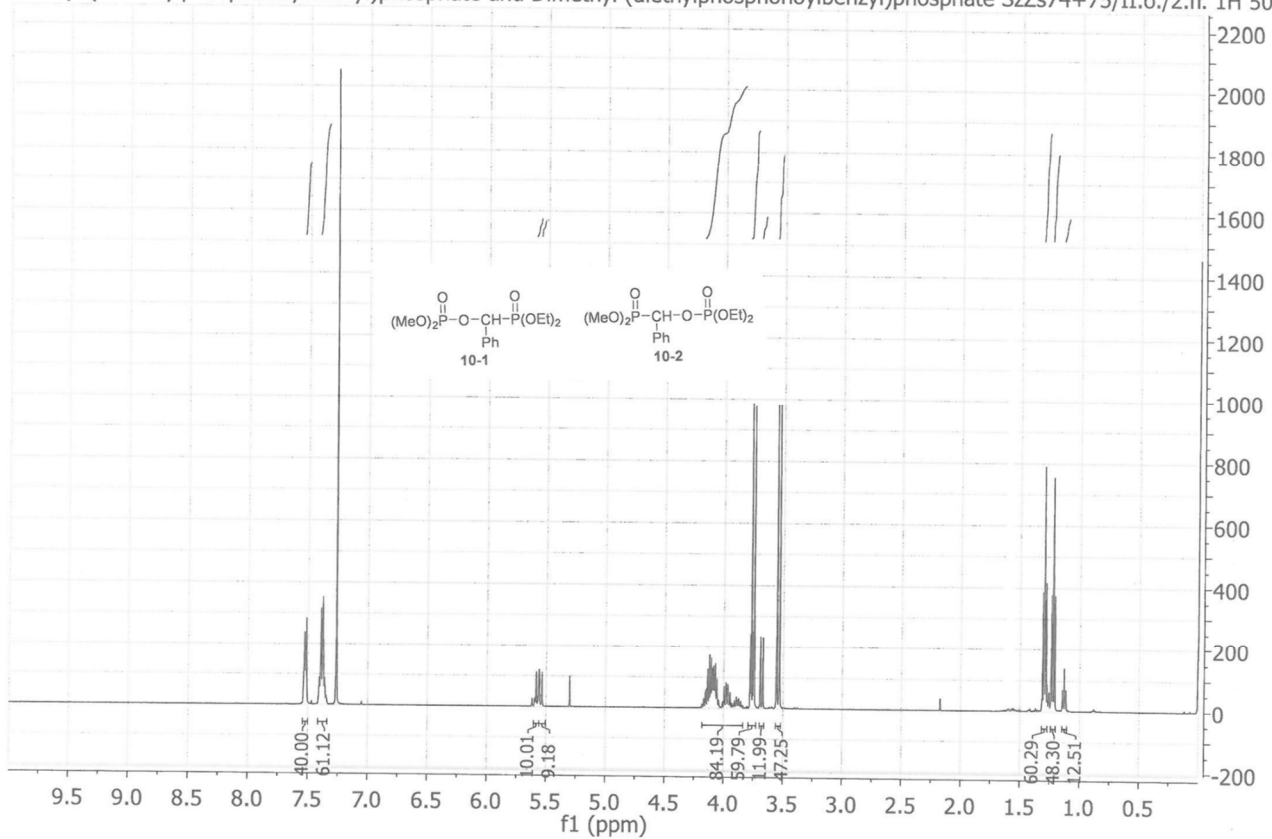

Diethyl 1-diphenylphosphinoyl-1-hydroxy-ethylphosphonate SzZs69+78+79/III.o./5.fr. 31P 500MHz

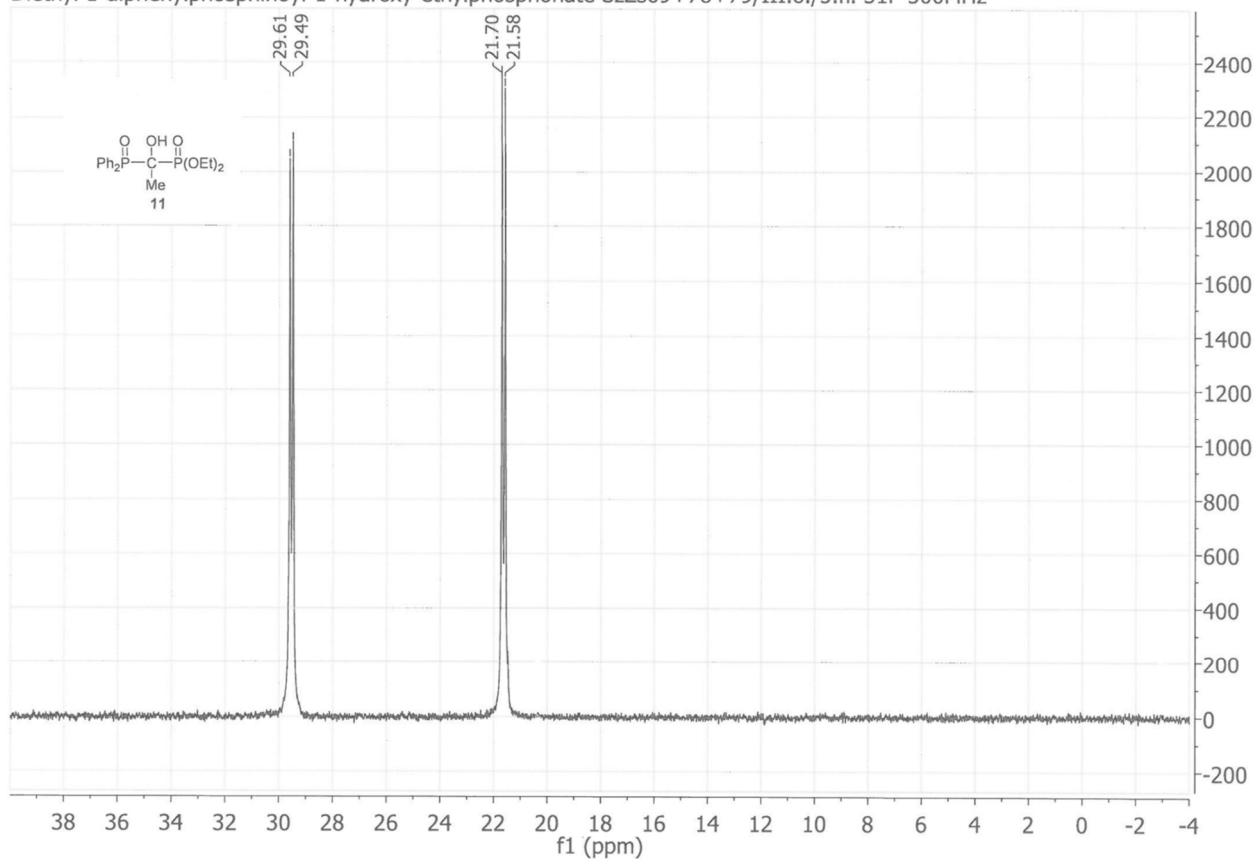

Diethyl 1-diphenylphosphinoyl-1-hydroxy-ethylphosphonate SzZs69+78+79/III.o./3.fr. 13C 300MHz

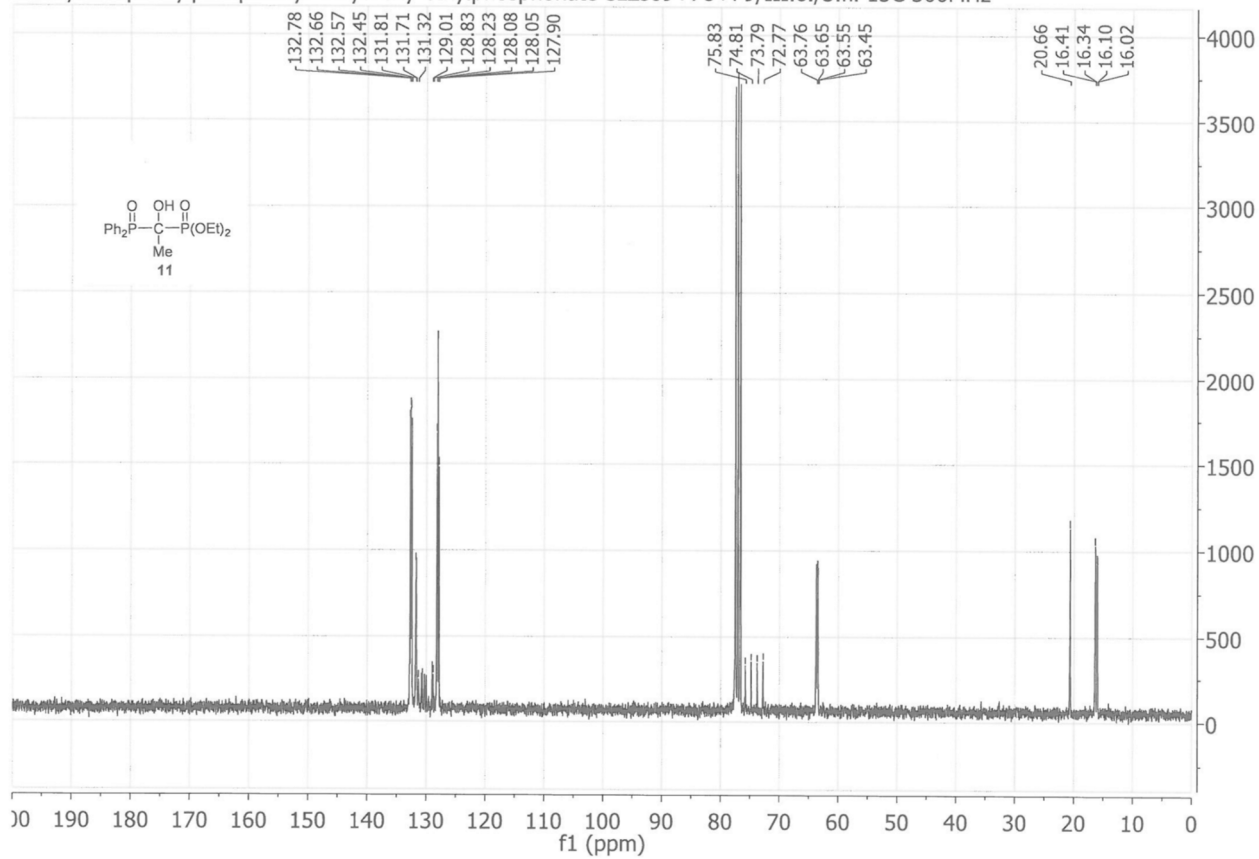

Diethyl 1-diphenylphosphinoyl-1-hydroxy-ethylphosphonate SzZs84átkr. 1H 500MHz

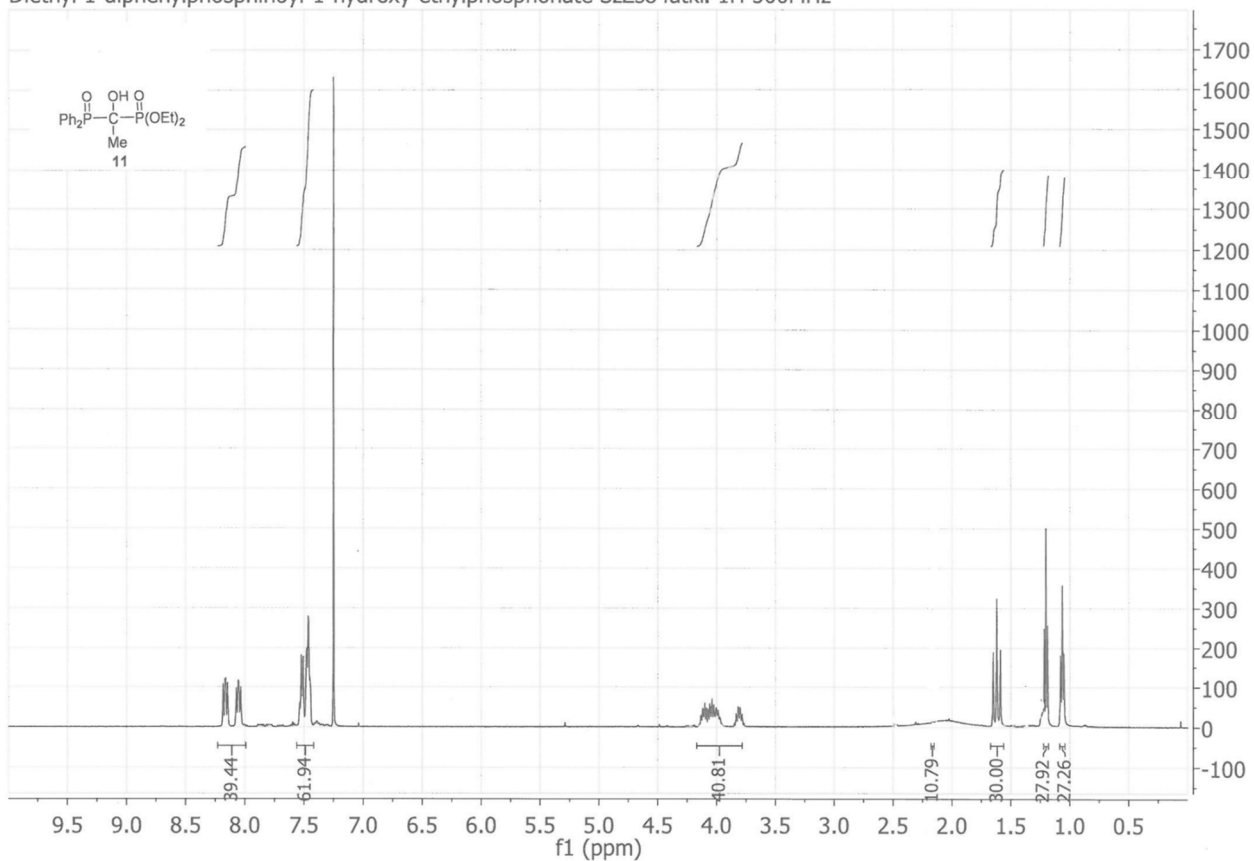

Diethyl (diphenylphosphinoylbenzyl)phosphate and Diethyl (diphenylphosphinoyloxybenzyl)phosphonate SzZs83/II.o./7.fr. 31P 5C

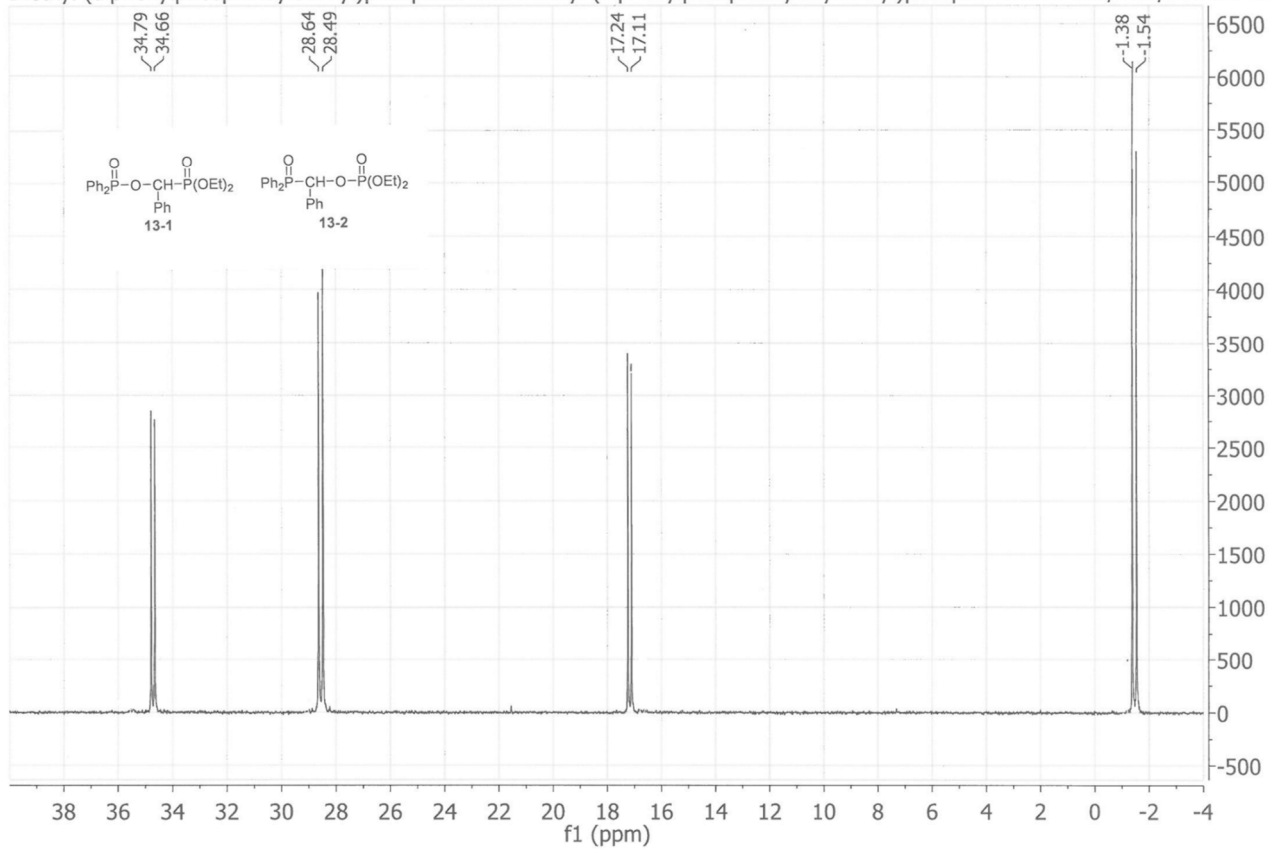



Diethyl (diphenylphosphinoylbenzyl)phosphate and Diethyl (diphenylphosphinoyloxybenzyl)phosphonate SzZs83/II.o./7.fr. 13C 50

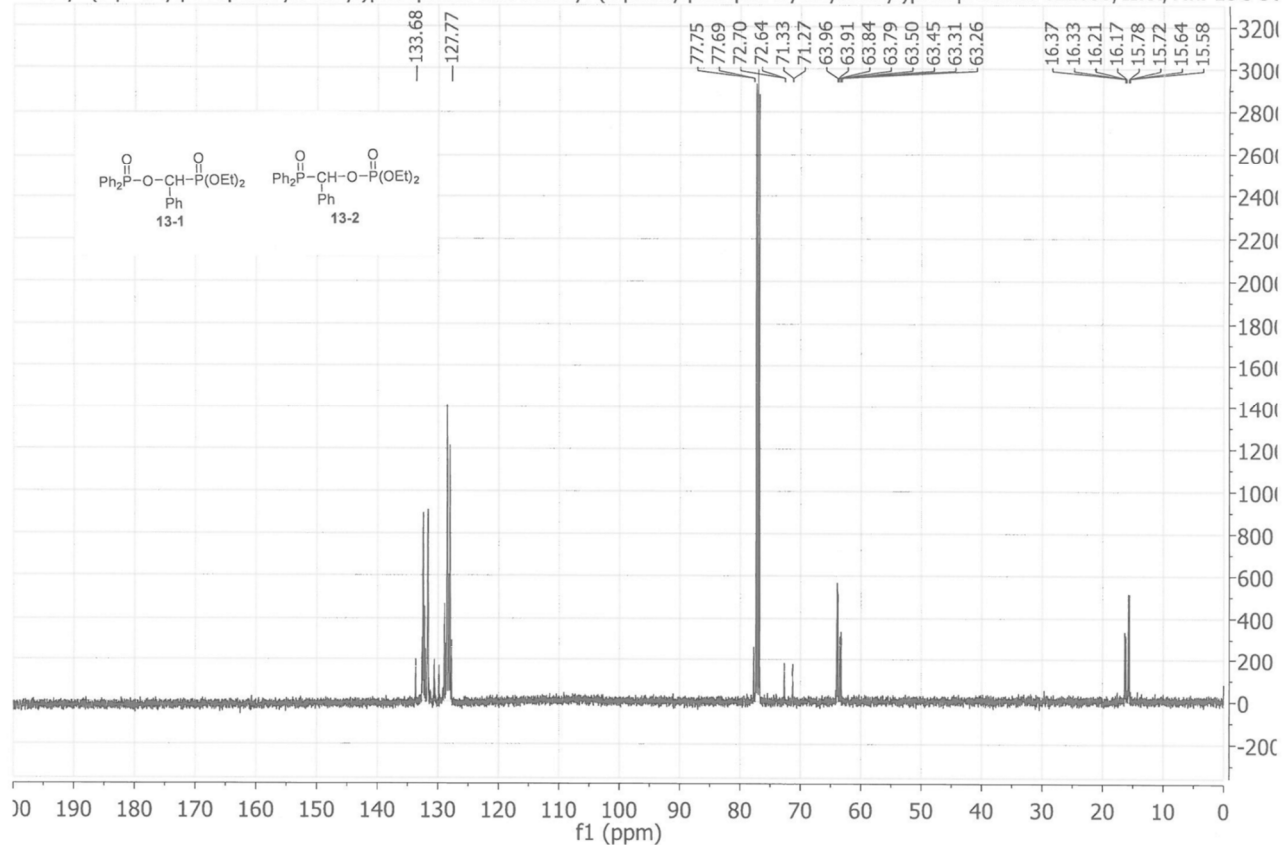

Diethyl (diphenylphosphinoylbenzyl)phosphate and Diethyl (diphenylphosphinoyloxybenzyl)phosphonate SzZs83/II.o./7.fr. 1H 50

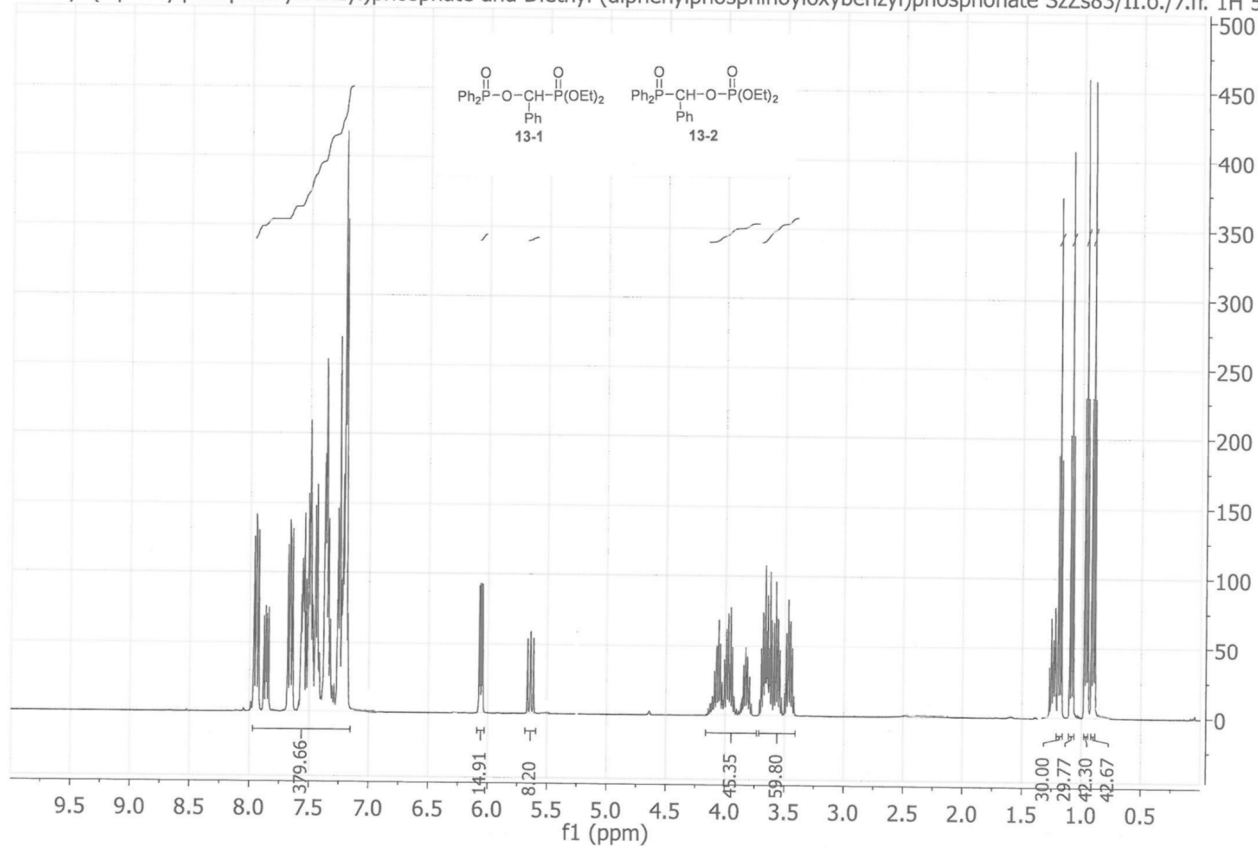

Supplement: s1 [file s1]
